# Supplementary material for: High-Resolution Respirometry Reveals MPP+ Mitochondrial Toxicity Mechanism in a Cellular Model of Parkinson’s Disease
Source: PubMed Central journal article supplement (PMC7659480; doi:10.3390/ijms21217809), 2020-10-22
Supplement: ijms-21-07809-s001.pdf [file ijms-21-07809-s001.pdf]

## Supplemental Materials

**Table S1.** Oxygen flux calculated for each respiratory state corrected for the ROX respiration in untreated (CTRL) and MPP<sup>+</sup> treated cells. Data are reported as mean  $\pm$  standard deviation of  $n = 5$  independent experiments.

|                                    | <i>CTRL</i>      | <i>MPP<sup>+</sup></i> |
|------------------------------------|------------------|------------------------|
| ROUTINE                            | 15.75 $\pm$ 3.68 | 4.77 $\pm$ 2.14        |
| LEAK                               | 5.62 $\pm$ 0.95  | 3.64 $\pm$ 1.86        |
| OXPHOS sustained by complex I      | 18.74 $\pm$ 4.28 | 5.68 $\pm$ 1.60        |
| OXPHOS sustained by complex I & II | 27.57 $\pm$ 5.97 | 10.15 $\pm$ 2.16       |
| ETS                                | 30.27 $\pm$ 5.49 | 11.29 $\pm$ 2.24       |
| ETS sustained by complex II        | 12.96 $\pm$ 2.41 | 7.99 $\pm$ 2.71        |

**Table S2.** FCR calculated for each respiratory state as ETS percentage in untreated (CTRL) and MPP<sup>+</sup> treated cells. Data are reported as mean  $\pm$  standard deviation of  $n = 5$  independent experiments.

|                                    | <i>CTRL</i>     | <i>MPP<sup>+</sup></i> |
|------------------------------------|-----------------|------------------------|
| ROUTINE                            | 0.51 $\pm$ 0.03 | 0.41 $\pm$ 0.12        |
| LEAK                               | 0.19 $\pm$ 0.05 | 0.31 $\pm$ 0.09        |
| OXPHOS sustained by complex I      | 0.61 $\pm$ 0.03 | 0.50 $\pm$ 0.13        |
| OXPHOS sustained by complex I & II | 0.90 $\pm$ 0.03 | 0.90 $\pm$ 0.07        |
| ETS sustained by complex II        | 0.42 $\pm$ 0.02 | 0.76 $\pm$ 0.18        |

**Table S3.** FCR calculated for net and coupling respiration, and E-R capacity factor. All data are expressed as ETS percentage in untreated (CTRL) and MPP<sup>+</sup> treated cells. Data are reported as mean  $\pm$  standard deviation of  $n = 5$  independent experiments.

|                                      | <i>CTRL</i>     | <i>MPP<sup>+</sup></i> |
|--------------------------------------|-----------------|------------------------|
| netROUTINE control ratio             | 0.32 $\pm$ 0.05 | 0.09 $\pm$ 0.07        |
| netOXPOS control ratio               | 0.71 $\pm$ 0.08 | 0.58 $\pm$ 0.12        |
| ROUTINE coupling efficiency          | 0.62 $\pm$ 0.10 | 0.23 $\pm$ 0.15        |
| OXPHOS coupling efficiency           | 0.78 $\pm$ 0.06 | 0.65 $\pm$ 0.11        |
| OXPHOS complex I coupling efficiency | 0.69 $\pm$ 0.08 | 0.53 $\pm$ 0.08        |
| ETS coupling efficiency              | 0.80 $\pm$ 0.05 | 0.68 $\pm$ 0.09        |
| <i>E-R</i> capacity factor           | 0.48 $\pm$ 0.03 | 0.58 $\pm$ 0.12        |
